# Supplementary material
Source: PubMed Central journal article supplement (PMC6990736)
Supplement: jamaoncol-6-206-s001.pdf [file jamaoncol-6-206-s001.pdf]

## Supplementary Online Content

Terrisse S, Karamouza E, Parker CC, et al; MORPHEP Collaborative Group. Overall survival in men with bone metastases from castration-resistant prostate cancer treated with bone-targeting radioisotopes: a meta-analysis of individual patient data from randomized clinical trials. *JAMA Oncol*. Published online December 12, 2019. doi:10.1001/jamaoncol.2019.4097

**eMethods 1.** Trial search strategy from PubMed

**eMethods 2.** Statistical methods

**eMethods 3.** Unplanned sensitivity analysis

**eMethods 4.** Unplanned post hoc analysis

**eMethods 5.** Unplanned sensitivity analysis

**eTable 1.** Description of the 6 randomized clinical trials included for the meta-analysis

**eTable 2.** Distribution of the potential confounding factors in the eligible trials

**eTable 3.** Patient characteristics, median follow-up, and number of events by trial and overall

**eTable 4.** Patient characteristics, median follow-up, and number of events by trial and by arm

**eTable 5.** Risk of bias summary: authors' judgments about each risk of bias item for each included study

**eTable 6.** Description of selected toxic effects of grade  $\geq 3$  per trial and per arm

**eFigure 1.** Flow diagram of studies inclusion and exclusion

**eFigure 2.** Overall survival for trials comparing radioisotopes (RIs) with no RIs according to the type of radiation emitted from RIs after excluding the MDA 1996 and EORTC trials

**eFigure 3.** Forest plot for subset analysis of overall survival according to the type of comparison

**eFigure 4.** Forest plots for serum prostate-specific antigen subgroup analysis for overall survival

**eFigure 5.** Forest plot for subset analysis according to the type of comparison for symptomatic skeletal event (SSE)-free survival

**eFigure 6.** Forest plots of alkaline phosphatase level subgroup analysis for symptomatic skeletal event (SSE)-free survival

**eFigure 7.** Hematological toxic effects analysis

**eFigure 8.** Nausea and/or vomiting analysis

**eFigure 9.** Febrile neutropenia toxic effects analysis

**eReferences.**

This supplementary material has been provided by the authors to give readers additional information about their work.

## **eMethods 1. Trial search strategy from PubMed**

The search strategy was performed for the period 1993-June 2013 using PubMed (see below), the Cochrane library, hand and internet searching of review articles, meeting proceedings (the American Society of Clinical Oncology (ASCO), the European Cancer Organisation (ECCO), the European Society for Medical Oncology (ESMO), the European Society for Radiotherapy and Oncology (ESTRO), the American Society for Radiation Oncology (ASTRO), The European association of nuclear medicine (EANM), the European Association of Urology (EAU), the American Urological Association (AUA)), and one trials' register (clinicaltrials.gov with such terms: Type of Cancer: "Prostate cancer"; Type of Trial: "Treatment"; Drug: "Radiopharmaceutical", "radio-isotope", "strontium", "samarium", "radium", "rhenium").

Key search PubMed terms included: "prostate cancer", "castration-resistant prostate cancer", "hormone-refractory prostate cancer", "bone metastasis", "radiopharmaceuticals", "radioisotopes", "samarium", "strontium", "radium-223", "rhenium", "randomized" in Title and/or in Abstract.

Trialists have been asked to review. Differences between investigators were resolved through consensus.

## **eMethods 2. Statistical methods**

### **Evaluation of the between-trial heterogeneity**

The between trials heterogeneity of the treatment effect was tested by Q-Cochran<sup>1</sup>, quantified by I<sup>2</sup> index<sup>2</sup> considered as small: <30%, moderate: 30-60% and substantial:>60%<sup>3</sup> and the between-study variance (tau<sup>2</sup>) estimated by a random effect model (RE)<sup>4</sup>. In presence of significant heterogeneity (p<0.10), any trials with a 95% CI that did not overlap with that of the overall treatment effect were excluded in a sensitivity analysis. If heterogeneity was still significant, we used a RE model.

### **Subgroup analyses**

To estimate the interaction between treatment effect and patients' subgroups (age, performance status, serum prostatic specific antigen, hemoglobin level, alkaline phosphatase level and number of bone metastases at baseline), we used the pooling of within trial covariate interaction (PWT)<sup>5</sup>. The PWT's approach consists firstly in estimating the interaction term between treatment effect and a patient subgroup within each trial, separately, by a Cox model. We also estimate the treatment effect for each category of the patient subgroup. Secondly, the treatment-covariate interaction effects are then pooled using the inverse-variance meta-analysis. The treatment effects of a category of a patient subgroup are also pooled. If between-trial heterogeneity of treatment-covariate interaction was observed (p<0.10) then the overall interaction was also estimated by a random approach (DerSimonian and Laird approach)<sup>4</sup>. If the treatment-covariate interaction remains significant by using a random approach (p<0.10) then the result of the subgroup analysis is reported through a forest plot. We then reported both the treatment effect in each category and the interaction term for each trial, and the overall treatment-covariate interaction. Some sensitivity analyses may be performed by excluding some trials in order to have homogeneous treatment effect in each category of the subgroup analysis.

Continuous covariates were categorized into 2 classes based on the median which was estimated from individual patient data of all trials (including the 2 trials for which individual patient data was not available for the different endpoints).

### **eMethods 3. Unplanned sensitivity analysis**

Although all data comparing RI versus no RI arms (ratio 1:1) from the 2x2 randomized TRAPEZE trial were considered, i.e. including patients treated or not by zoledronic acid (ZA) because there is no known interaction between Sr-89 and ZA ( $p=0.40$ ), we performed, as suggested by a reviewer, an unplanned sensitivity analysis including only no-ZA patients from TRAPEZE trial in the meta-analysis. Considering the high impact of this trial (one of the two largest trials) and the possible marginal effect of ZA it might be useful to examine whether this may affect the final conclusions. The only major change was the significant overall benefit of RI on SSE with an overall treatment effect of 0.74 95% CI [0.62-0.88] ( $p_{\text{heterogeneity}}=0.29$ ,  $I^2=20\%$ ) (RE HR= 0.74, 95%CI [0.60-0.91]). This is explained by a larger effect size of TRAPEZE trial on SSE moving from 0.95 95% CI [0.78-1.16] to 0.90 [0.69-1.18] after excluding ZA-patients.

#### **eMethods 4. Unplanned post hoc analysis**

This analysis showed that RI was associated with a significant OS benefit compared with no RI (FE: HR=0.91, 95% CI [0.83,1.00]; p=0.05) but with a significant (p<0.001) and substantial (I<sup>2</sup>=81%) heterogeneity between trials. A random effect (RE) model showed no significant treatment effect (HR=0.86 95% CI [0.67;1.10], p=0.24, (tau<sup>2</sup>=0.08)). For the sensitivity analysis (excluding two trials<sup>25,27</sup>), fixed effect (FE) HR was 0.89 (95% CI [0.80;0.98], p=0.02) (I<sup>2</sup>=73%) (RE HR=0.88, 95% CI [0.70;1.10], p=0.26 (tau<sup>2</sup>=0.04)). In  $\alpha$ -emitter subset, RI was associated with a significant OS benefit compared with no RI (FE: HR=0.85, 95% CI [0.74;0.98], p=0.026) but with a significant (p<0.001) and substantial (I<sup>2</sup>=86%) heterogeneity. RE yields an HR=0.82 (95% CI [0.53;1.25], p=0.35).

## **eMethods 5. Unplanned sensitivity analysis**

As suggested by a reviewer, we examined whether summary statistics extracted from published data of the three trials (See eReferences<sup>12-14</sup>) excluded due to the non-availability of individual patient data (no response to exchange or no possibility to access to the data) may have cause a availability bias and thus affect the conclusions (unplanned analysis). From these three trials all belong to  $\beta$ -emitter subset, only two HRs (HR=1.00, n=162 and 1.34, n=131) for OS could be estimated without precision from medians and assuming an exponential distribution. Regarding these point estimates higher or equal to the null value of 1, their combination in the current meta-analysis assuming a range of precision associated to these point estimates does not change the overall HR toward the null value and thus does not change the findings of non-significant difference between RI and no RI both for overall and in  $\beta$ -emitter subset.

**eTable 1.** Description of the 6 randomized clinical trials included for the meta-analysis

| Trial                            | Nb. of patients | Inclusion period | Arm without RI                                                                                                          | Arm with RI                                                                                 | Description of RI          | Trial design        | Cross over |
|----------------------------------|-----------------|------------------|-------------------------------------------------------------------------------------------------------------------------|---------------------------------------------------------------------------------------------|----------------------------|---------------------|------------|
| <b>Strontium-89 groups</b>       |                 |                  |                                                                                                                         |                                                                                             |                            |                     |            |
| <b>EORTC 30921</b> <sup>6</sup>  | 203             | 1993-2000        | Local ERT: usual radiotherapy regimen used at the study centre                                                          | Sr-89: 150 MBq (4mCi)                                                                       | Single dose                | Phase III           | No         |
| <b>MDA 1996</b> <sup>7</sup>     | 72*             | 1996-1999        | Doxorubicine 8020 mg/m <sup>2</sup> once a week x 6 weeks                                                               | Sr-89:2.035 MBq/kg + doxorubicine                                                           | Single dose                | Randomized phase II | No         |
| <b>Norway 1997</b> <sup>8</sup>  | 64              | 1997-2000        | Local ERT: 3 Gy/fraction in 10 fractions or 8 Gy in one fraction. +Placebo                                              | Sr-89:150 MBq at J1 of ERT + local ERT                                                      | Single dose                | Phase III           | No         |
| <b>TRAPEZE</b> <sup>9</sup>      | 757             | 2005-2012        | 2 groups:<br>A: Docetaxel 75mg/m <sup>2</sup> /3w+prednisolone 10mg od (ST**). B: ST+ zoledronic Acid 4 mg (Cycle 1-10) | 2 groups<br>C: ST+ Sr-89 150 MBq<br>D: ST+ Zoledronic Acid 4 mg +Sr-89 150 MBq (Cycle 1-10) | Single dose day 28 cycle 6 | Phase III           | No         |
| <b>Radium-223 groups</b>         |                 |                  |                                                                                                                         |                                                                                             |                            |                     |            |
| <b>Bayer 15280</b> <sup>10</sup> | 64              | 2004-2005        | SOC***                                                                                                                  | Ra-223: 50 kBq/kg/4weeks                                                                    | 4 IV administrations       | Randomized phase II | No         |
| <b>ALSYMPCA</b> <sup>11</sup> §  | 921             | 2008-2011        | Placebo                                                                                                                 | Ra-223:50 kBq/kg/4weeks                                                                     | 6 IV administrations       | Phase III           | Yes        |

ERT: external radiotherapy for bone metastases; Gy: Gray; MBq; Megabecquerel; od: once day; RI: radio-isotopes; Ra: radium, Sr: strontium, NA: Not available ; \*: responders or stable after induction chemotherapy (maintenance treatment); \*\* ST: standard treatment, trial with a 2x2 design, the second randomization was zoledronic acid yes/no. § Randomization 1:2 \*\*\*SOC: Standard Of Care

EORTC= European Organisation for Research and Treatment of Cancer, MDA= M D Anderson Cancer Center, TRAPEZE= Taxane RAdioisotoPE ZolEdronic acid, ALSYMPCA= ALpharadin in SYMptomatic Prostate CAncer patients

**eTable 2.** Distribution of the potential confounding factors in the eligible trials

| Study                            | Type of RI | Type of radiation emitted from RI | Type of comparison    | CT in both arms | RT in both arms | Cross-over |
|----------------------------------|------------|-----------------------------------|-----------------------|-----------------|-----------------|------------|
| <b>EORTC 30921</b> <sup>6</sup>  | Sr-89      | β                                 | RI vs ERT             | No              | No              | No         |
| <b>MDA 1996</b> <sup>10 **</sup> | Sr-89      | β                                 | RI + CT vs CT         | Yes             | No              | No         |
| <b>Norway 1997</b> <sup>8</sup>  | Sr-89      | β                                 | RI + local ERT vs ERT | No              | Yes             | No         |
| <b>TRAPEZE</b> <sup>9</sup>      | Sr -89     | β                                 | RI + CT vs CT         | Yes             | No              | No         |
| <b>Bayer 15280</b> <sup>10</sup> | Ra-223     | α                                 | RI vs SOC***          | No              | No              | No         |
| <b>ALSYMPCA</b> <sup>11</sup>    | Ra-233     | α                                 | RI vs Placebo         | No              | No              | Yes        |

Ra: radium, Sr: Strontium, RI: radio-isotope, ERT: external radiotherapy, CT: chemotherapy, \*\* responders or stable after induction chemotherapy, β: beta emitted radiation from RI, α: alpha emitted radiation from RI, \*\*\* SOC: Standard Of Care  
see eTable 1 for other abbreviations



**eTable 3.** Patient characteristics, median follow-up, and number of events by trial and overall

| Characteristics <sup>†</sup>                 | EORTC30921 <sup>6</sup><br>(n=203)<br>(6·8%) | MDA 1996 <sup>7</sup><br>(n=72)<br>(3·5%) | Norway 1997 <sup>8</sup><br>(n=64)<br>(3·1%) | Bayer<br>15280 <sup>10</sup><br>(n=64)<br>(3·1%) | TRAPEZE <sup>9</sup><br>(n=757)<br>(36·4%) | ALSYMPCA <sup>11</sup><br>(n=921)<br>(44·3%) | Overall<br>(n=2081)<br>(100%) |
|----------------------------------------------|----------------------------------------------|-------------------------------------------|----------------------------------------------|--------------------------------------------------|--------------------------------------------|----------------------------------------------|-------------------------------|
| <b>Age (years) Median [IQR]</b>              | 70·0 [65·0-75·0]                             | 67·0[60·2-70·9]                           | 70·9[63·8-75·9]                              | 72·5[68·0-78·0]                                  | 68·9 [63·9-73·4]                           | 71·0 [64·0-76·0]                             | 70·0[64·0-75·0]               |
| <70                                          | 115 (56·6)                                   | 47 (65·3)                                 | 34 (53·1)                                    | 23 (35·9)                                        | 342 (45·2)                                 | 526 (57·1)                                   | 1083(52·0)                    |
| ≥70                                          |                                              | 25 (34·7)                                 |                                              | 41 (64·1)                                        |                                            |                                              |                               |
| missing                                      |                                              |                                           |                                              |                                                  |                                            |                                              |                               |
| <b>Performance status</b>                    |                                              |                                           |                                              |                                                  |                                            |                                              |                               |
| 0,1                                          | 122 (60·4)                                   | 65 (90·3)                                 | 39 (60·9)                                    | 53 (82·8)                                        | 694 (91·7)                                 | 801 (87·2)                                   | 1774 (85·4)                   |
| ≥2                                           | 80 (39·6)                                    | 7 (9·7)                                   | 25 (39·1)                                    | 11 (17·2)                                        | 63 (8·3)                                   | 118 (12·8)                                   | 304 (14·6)                    |
| missing                                      | 1                                            |                                           |                                              |                                                  |                                            | 2                                            | 3                             |
| <b>Serum PSA</b>                             |                                              |                                           |                                              |                                                  |                                            |                                              |                               |
| <143                                         | 110 (56·1)                                   | 48 (66·7)                                 | 36 (56·2)                                    | 29 (45·3)                                        | 362 (49·6)                                 | 433 (47·6)                                   | 1018 (50·0)                   |
| ≥143                                         | 86 (43·9)                                    | 24 (33·3)                                 | 28 (43·8)                                    | 35 (54·7)                                        | 368 (50·4)                                 | 477 (52·4)                                   | 1018 (50·0)                   |
| missing                                      | 7                                            |                                           |                                              |                                                  | 27                                         | 11                                           | 45                            |
| <b>Hemoglobin</b>                            |                                              |                                           |                                              |                                                  |                                            |                                              |                               |
| <12·4                                        | 102 (52·8)                                   | 22 (30·6)                                 | 26 (40·6)                                    | 24 (37·5)                                        | 360 (48·1)                                 | 498 (54·1)                                   | 1032 (50·0)                   |
| ≥12·4                                        | 91 (47·2)                                    | 50 (69·4)                                 | 38 (59·4)                                    | 40 (62·5)                                        | 388 (51·9)                                 | 423 (45·9)                                   | 1030 (50·0)                   |
| missing                                      | 10                                           |                                           |                                              |                                                  | 9                                          |                                              | 19                            |
| <b>Alkaline Phosphatases</b>                 |                                              |                                           |                                              |                                                  |                                            |                                              |                               |
| <248·5                                       | 83 (43·0)                                    | 44 (61·1)                                 | 11 (17·2)                                    | 31 (48·4)                                        | 341 (46·0)                                 | 518 (56·2)                                   | 1028 (50·0)                   |
| ≥248·5                                       | 110 (57·0)                                   | 28 (38·9)                                 | 53 (82·8)                                    | 33 (51·6)                                        | 401 (54·0)                                 | 403 (43·8)                                   | 1028 (50·0)                   |
| missing                                      | 10                                           |                                           |                                              |                                                  | 15                                         |                                              | 25                            |
| <b>Number of bone metastases**</b>           |                                              |                                           |                                              |                                                  |                                            |                                              |                               |
| ≤6                                           | 65 (32·8)                                    | 15 (20·8)                                 | 9 (14·1)                                     | 19 (29·7)                                        | NA                                         | 138 (15·0)                                   | 246 (18·7)                    |
| >6                                           | 133 (67·2)                                   | 57 (79·2)                                 | 55 (85·9)                                    | 45 (70·3)                                        |                                            | 779 (85·0)                                   | 1069 (81·3)                   |
| missing                                      | 5                                            |                                           |                                              |                                                  |                                            | 4                                            | 9                             |
| <b>Median follow-up (min-max) (months)</b>   | 62·7 (1·8-62·7)                              | 22·3 (1·0-32·3)                           | NE (2·6,188·1)                               | 12·1 (0·5-25·6)                                  | 39·2 (0·4-75·1)                            | 10·0 (0·4-36·6)                              | 26·7 (0·4-188·1)              |
| <b>Number of deaths</b>                      | 194 (95·6)                                   | 41 (56·9)                                 | 64 (100)                                     | 50 (78·1)                                        | 618 (81·6)                                 | 528 (57·3)                                   | 1495 (71·8)                   |
| <b>Number of symptomatic skeletal events</b> | NA                                           | NA                                        | 20 (31·3)                                    | 33 (51·6)                                        | 396 (52·3)                                 | 318 (34·5)                                   | 767 (42·5)                    |
| Spinal cord compression                      |                                              |                                           | 4 (6·3)                                      | 5 (7·8)                                          | 58 (7·7)                                   | 23 (2·5)                                     | 90 (5·0)                      |
|                                              |                                              |                                           | 0                                            | 2 (3·1)                                          | 25 (3·3)                                   | 34 (3·7)                                     | 61 (3·4)                      |

|                                    |           |           |            |            |            |
|------------------------------------|-----------|-----------|------------|------------|------------|
| Pathologic bone fracture           | 0         | 0         | 1 (0·1)    | 2 (0·2)    | 3 (0·2)    |
| Surgical intervention              | 16 (25·0) | 26 (40·6) | 312 (41·2) | 259 (28·1) | 613 (33·9) |
| External radiotherapy <sup>‡</sup> |           |           |            |            |            |

NA= not available, NE=Not estimable,<sup>†</sup> Continuous characteristics will be divided into 2 classes using the median

\*\* For the Bayer152850<sup>10</sup> and ALSYMPCA<sup>11</sup> trials, superscan was considered as higher than 6 bone metastases. For TRAPEZE trial<sup>9</sup>, NA means that the number of bone metastases at baseline was not collected /available in this trial

<sup>‡</sup> This category contains both external beam radiotherapy and use of radioisotope for TRAPEZE trial<sup>9</sup>  
see eTable 1 for other abbreviations

**eTable 4.** Patient characteristics, median follow-up, and number of events by trial and by arm

| Characteristics <sup>†</sup>                 | EORTC30921 <sup>6</sup><br>(n=203)<br>(6.8%) |                    | MDA 1996 <sup>7</sup><br>(n=72)<br>(3.5%) |                     | Norway 1997 <sup>8</sup><br>(n=64)<br>(3.1%) |                     | Bayer 15280 <sup>10</sup><br>(n=64)<br>(3.1%) |                     | TRAPEZE <sup>9</sup><br>(n=757)<br>(36.4%) |                     | ALSYMPCA <sup>9</sup><br>(n=921)<br>(44.3%) |                     | Overall<br>(n=2081)<br>(100%) |                   |
|----------------------------------------------|----------------------------------------------|--------------------|-------------------------------------------|---------------------|----------------------------------------------|---------------------|-----------------------------------------------|---------------------|--------------------------------------------|---------------------|---------------------------------------------|---------------------|-------------------------------|-------------------|
|                                              | RI<br>(n=101)                                | no RI<br>(n=102)   | RI<br>(n=36)                              | no RI<br>(n=36)     | RI<br>(n=30)                                 | no RI<br>(n=34)     | RI<br>(n=33)                                  | no RI<br>(n=31)     | RI<br>(n=378)                              | no RI<br>(n=379)    | RI<br>(n=614)                               | no RI<br>(n=307)    | RI<br>(n=1192)                | no RI<br>(n=889)  |
| <b>Age (years) Median [IQR]</b>              | 70<br>[66-77]                                | 70<br>[65-75]      | 67.0<br>[59.0-71.6]                       | 67.1<br>[61.9-70.7] | 70.7<br>[65.5-73.6]                          | 71.7<br>[62.5-76.3] | 73.0<br>[68.0-79.0]                           | 72.0<br>[67.0-78.0] | 68.6<br>[63.2-73.1]                        | 68.9<br>[64.3-73.8] | 71.0<br>[64.0-76.0]                         | 71.0<br>[65.0-77.0] | NE<br>NE                      | NE<br>NE          |
| <70                                          | 43 (42.6)                                    | 45 (44.1)          | 24 (66.7)                                 | 23 (63.9)           | 14 (46.7)                                    | 16 (47.1)           | 11 (33.3)                                     | 12 (38.7)           | 209 (55.3)                                 | 206 (54.4)          | 263 (42.8)                                  | 132 (43.0)          | 564 (47.3)                    | 434 (48.8)        |
| ≥70                                          | 58 (57.4)                                    | 57 (55.9)          | 12 (33.3)                                 | 13 (36.1)           | 16 (53.3)                                    | 18 (52.9)           | 22 (66.7)                                     | 19 (61.3)           | 169 (44.7)                                 | 173 (45.6)          | 351 (57.2)                                  | 175 (57.0)          | 628 (52.7)                    | 455 (51.2)        |
| <b>Performance status</b>                    |                                              |                    |                                           |                     |                                              |                     |                                               |                     |                                            |                     |                                             |                     |                               |                   |
| 0,1                                          | 67 (66.3)                                    | 55 (54.5)          | 35 (97.2)                                 | 30 (83.3)           | 20 (66.7)                                    | 19 (55.9)           | 27 (81.8)                                     | 26 (83.9)           | 346 (91.5)                                 | 348 (91.8)          | 536 (87.4)                                  | 265 (86.6)          | 1031 (86.6)                   | 743 (83.8)        |
| ≥2                                           | 34 (33.7)                                    | 46 (45.5)          | 1 (2.8)                                   | 6 (16.7)            | 10 (33.3)                                    | 15 (44.1)           | 6 (18.2)                                      | 5 (16.1)            | 32 (8.5)                                   | 31 (8.2)            | 77 (12.6)                                   | 41 (13.4)           | 160 (13.4)                    | 144 (16.2)        |
| missing                                      |                                              | 1                  |                                           |                     |                                              |                     |                                               |                     |                                            |                     | 1                                           | 1                   | 1                             | 2                 |
| <b>Serum PSA</b>                             |                                              |                    |                                           |                     |                                              |                     |                                               |                     |                                            |                     |                                             |                     |                               |                   |
| <143                                         | 48 (49.0)                                    | 62 (63.3)          | 23 (63.9)                                 | 25 (69.4)           | 15 (50.0)                                    | 21 (61.8)           | 15 (45.5)                                     | 14 (45.2)           | 180 (49.5)                                 | 182 (49.7)          | 298 (49.3)                                  | 135 (44.3)          | 579 (49.7)                    | 439 (50.5)        |
| ≥143                                         | 50 (51.0)                                    | 36 (36.7)          | 13 (36.1)                                 | 11 (30.6)           | 15 (50.0)                                    | 13 (38.2)           | 18 (54.5)                                     | 17 (54.8)           | 184 (50.5)                                 | 184 (50.3)          | 307 (50.7)                                  | 170 (55.7)          | 587 (50.3)                    | 431 (49.5)        |
| missing                                      | 3                                            | 4                  |                                           |                     |                                              |                     |                                               |                     | 14                                         | 13                  | 9                                           | 2                   | 26                            | 19                |
| <b>Hemoglobin</b>                            |                                              |                    |                                           |                     |                                              |                     |                                               |                     |                                            |                     |                                             |                     |                               |                   |
| <12.4                                        | 46 (47.9)                                    | 56 (57.7)          | 8 (22.2)                                  | 14 (38.9)           | 15 (50.0)                                    | 11 (32.3)           | 12 (36.4)                                     | 12 (38.7)           | 174 (46.8)                                 | 186 (49.5)          | 329 (53.6)                                  | 169 (55.0)          | 584 (49.4)                    | 448 (50.9)        |
| ≥12.4                                        | 50 (52.1)                                    | 41 (42.3)          | 28 (77.8)                                 | 22 (61.1)           | 15 (50.0)                                    | 23 (67.7)           | 21 (63.6)                                     | 19 (61.3)           | 198 (53.2)                                 | 190 (50.5)          | 285 (46.4)                                  | 138 (45.0)          | 597 (50.6)                    | 433 (49.1)        |
| missing                                      | 5                                            | 5                  |                                           |                     |                                              |                     |                                               |                     | 6                                          | 3                   |                                             |                     | 11                            | 8                 |
| <b>Alkaline Phosphatases</b>                 |                                              |                    |                                           |                     |                                              |                     |                                               |                     |                                            |                     |                                             |                     |                               |                   |
| <248.5                                       | 48 (49.0)                                    | 35 (36.8)          | 24 (66.7)                                 | 20 (55.6)           | 4 (13.3)                                     | 7 (20.6)            | 17 (51.5)                                     | 14 (45.2)           | 171 (46.5)                                 | 170 (45.5)          | 345 (56.2)                                  | 173 (56.4)          | 609 (51.7)                    | 419 (47.8)        |
| ≥248.5                                       | 50 (51.0)                                    | 60 (63.2)          | 12 (33.3)                                 | 16 (44.4)           | 26 (86.7)                                    | 27 (79.4)           | 16 (48.5)                                     | 17 (54.8)           | 197 (53.5)                                 | 204 (54.5)          | 269 (43.8)                                  | 134 (43.6)          | 570 (48.3)                    | 458 (52.2)        |
| missing                                      | 3                                            | 7                  |                                           |                     |                                              |                     |                                               |                     | 10                                         | 5                   |                                             |                     | 13                            | 12                |
| <b>Number of bone metastases**</b>           |                                              |                    |                                           |                     |                                              |                     |                                               |                     |                                            |                     |                                             |                     |                               |                   |
| ≤6                                           | 28 (28.6)                                    | 37 (37.0)          | 7 (19.4)                                  | 8 (22.2)            | 5 (16.7)                                     | 4 (11.8)            | 12 (36.4)                                     | 7 (22.6)            | NA                                         | NA                  | 100 (16.4)                                  | 38 (12.4)           | 152 (18.8)                    | 94 (18.5)         |
| >6                                           | 70 (71.4)                                    | 63 (63.0)          | 29 (80.6)                                 | 28 (77.8)           | 25 (83.3)                                    | 30 (88.2)           | 21 (63.6)                                     | 24 (77.4)           |                                            |                     | 511 (83.6)                                  | 268 (87.6)          | 656 (81.2)                    | 413 (81.5)        |
| missing                                      | 3                                            | 2                  |                                           |                     |                                              |                     |                                               |                     |                                            |                     | 3                                           | 1                   | 6                             | 3                 |
| <b>Median follow-up (min-max) (months)</b>   | 62.7<br>(12.0-62.7)                          | 50.3<br>(1.8-52.3) | 22.0<br>(1.0-32.3)                        | 22.3<br>(1.7-28.6)  | NE<br>(2.9-112.3)                            | NE<br>(2.6-188.1)   | 15.0<br>(0.7-25.6)                            | 9.8<br>(0.5-24.5)   | 38.4<br>(1.7-75.1)                         | 39.1<br>(0.4-59.3)  | 10.8<br>(0.4-33.8)                          | 9.1<br>(0.7-36.6)   | NE<br>(0.4-112.3)             | NE<br>(0.4-188.1) |
| <b>Number of deaths</b>                      | 97 (96.0)                                    | 97 (95.1)          | 14<br>(38.9)                              | 27 (75.0)           | 30 (100)                                     | 34 (100)            | 23 (69.7)                                     | 27 (87.1)           | 308 (81.5)                                 | 310 (81.8)          | 333 (54.2)                                  | 195 (63.5)          | 805 (67.5)                    | 690 (77.6)        |
| <b>Number of symptomatic skeletal events</b> | NA                                           | NA                 | NA                                        | NA                  | 8 (26.7)                                     | 12 (35.3)           | 16 (48.5)                                     | 17 (54.8)           | 199 (52.6)                                 | 197 (52.0)          | 202 (32.9)                                  | 116 (37.8)          | 425 (35.6)                    | 342 (38.5)        |
| Spinal cord compression                      |                                              |                    |                                           |                     |                                              |                     |                                               |                     |                                            |                     |                                             |                     |                               |                   |
| Pathologic bone fracture                     |                                              |                    |                                           |                     | 1(3.3)                                       | 3(8.8)              | 2 (6.1)                                       | 3 (9.7)             | 31 (8.2)                                   | 27 (7.1)            | 14 (2.3)                                    | 9 (2.9)             | 48 (4.0)                      | 42 (4.7)          |
| Surgical intervention                        |                                              |                    |                                           |                     | 0                                            | 0                   | 1 (3.0)                                       | 1 (3.2)             | 14 (3.7)                                   | 11 (2.9)            | 22 (3.6)                                    | 12 (3.9)            | 37 (3.1)                      | 24 (2.7)          |
| External radiotherapy <sup>‡</sup>           |                                              |                    |                                           |                     | 0                                            | 0                   | 0                                             | 0                   | 0                                          | 1 (0.3)             | 2 (0.3)                                     | 0                   | 2 (0.2)                       | 1 (0.1)           |
|                                              |                                              |                    |                                           |                     | 7 (23.3)                                     | 9 (26.5)            | 13 (39.4)                                     | 13 (41.9)           | 154 (40.7)                                 | 158 (41.7)          | 164 (26.7)                                  | 95 (30.9)           | 338 (28.4)                    | 275 (30.9)        |

NE= not estimable, NA= not available; IQR= Interquartile Range; RI= radio-isotopes, <sup>†</sup> Continuous characteristics will be divided into 2 classes using the median, <sup>\*\*</sup> For the Bayer152850 <sup>10</sup> and ALSYMPCA<sup>11</sup> trials, superscan was considered as higher than 6 bone metastases. <sup>‡</sup> This category contains both external beam radiotherapy and use of radioisotope for TRAPEZE trial<sup>9</sup>, see eTable 1 for other abbreviations

**eTable 5.** Risk of bias summary: authors' judgments about each risk of bias item for each included study

| Items                                                            | EORTC30921 | MDA 1996 | Norway 1997 | Bayer 15280 | TRAPEZE | ALSYMPCA |
|------------------------------------------------------------------|------------|----------|-------------|-------------|---------|----------|
| <b>Random sequence generation (selection bias)</b>               | -          | +        | -           | -           | ?       | -        |
| <b>Allocation concealment (selection bias)</b>                   | -          | -        | -           | -           | -       | -        |
| <b>Follow-up quality (Kaplan-Meier inverted)</b>                 | -          | -        | -           | -           | -       | -        |
| <b>Blinding of participants and personnel (performance bias)</b> | -          | ?        | -           | -           | ?       | -        |
| <b>Blinding of outcome assessment (detection bias)</b>           | -          | -        | -           | -           | -       | -        |
| <b>Incomplete outcome data (attrition bias)</b>                  | -          | -        | -           | -           | -       | -        |
| <b>Selective reporting (reporting bias)</b>                      | -          | -        | -           | -           | -       | -        |
| <b>Other bias</b>                                                | ?          | ?        | ?           | ?           | ?       | ?        |

Each domain was judged as 'low risk of bias' (-), 'high risk of bias' (+), or 'unclear risk of bias' (?) in each study according to the Cochrane Handbook for Systematic Reviews of Interventions (Higgins JPT, Green S. Cochrane Handbook for Systematic Reviews of Interventions. The Cochrane Collaboration; 2011).

**eTable 6.** Description of selected toxic effects of grade  $\geq 3$  per trial and per arm

| Trials                           | Hematological toxicity <sup>‡</sup>                      |                                                     | Nausea and/or vomiting                                   |                                                     | Febrile neutropenia                                      |                                                     |
|----------------------------------|----------------------------------------------------------|-----------------------------------------------------|----------------------------------------------------------|-----------------------------------------------------|----------------------------------------------------------|-----------------------------------------------------|
|                                  | # of toxicities / n<br>in experimental arm<br>Missing: n | # of toxicities / n<br>in control arm<br>Missing: n | # of toxicities / n<br>in experimental arm<br>Missing: n | # of toxicities / n<br>in control arm<br>Missing: n | # of toxicities / n<br>in experimental arm<br>Missing: n | # of toxicities / n<br>in control arm<br>Missing: n |
| <b>EORTC 30921</b> <sup>6*</sup> | 41/ 81<br>20                                             | 40/89<br>13                                         | 13/94<br>7                                               | 7/85<br>17                                          | NA                                                       | NA                                                  |
| <b>MDA 1996</b> <sup>7</sup>     | 18/36                                                    | 12/36                                               | 3/36                                                     | 6/36                                                | 0/36                                                     | 2/36                                                |
| ‡                                | 0                                                        | 0                                                   | 0                                                        | 0                                                   | 0                                                        | 0                                                   |
| <b>Norway 1997</b> <sup>8</sup>  | 3/28                                                     | 2/ 31                                               | 6/26                                                     | 6/27                                                | 0/30                                                     | 0/34                                                |
| ‡                                | 2                                                        | 3                                                   | 4                                                        | 7                                                   | 0                                                        | 0                                                   |
| <b>Bayer15280</b> <sup>10</sup>  | 2/33                                                     | 2/31                                                | 1/9                                                      | 0/10                                                | 0/33                                                     | 0/31                                                |
| ‡                                | 0                                                        | 0                                                   | 24                                                       | 21                                                  | 0                                                        | 0                                                   |
| <b>TRAPEZE</b> <sup>9†</sup>     | 54/ 378                                                  | 47/ 379                                             | 11/378                                                   | 7/379                                               | 28/ 378                                                  | 26/ 379                                             |
| ‡                                | 0                                                        | 0                                                   | 0                                                        | 0                                                   | 0                                                        | 0                                                   |
| <b>ALSYMPCA</b> <sup>11</sup>    | 122/ 606                                                 | 35/ 301                                             | 16/ 259                                                  | 10/120                                              | 1/ 614                                                   | 1/307                                               |
| ‡‡                               | 8                                                        | 6                                                   | 355                                                      | 187                                                 | 0                                                        | 0                                                   |

NA: not available, <sup>‡</sup> hematological toxicity includes hemoglobin, white blood cells and platelets

<sup>†</sup> information related to the occurrence of febrile neutropenia was not available for EORTC 30921's trial <sup>6</sup> because not in the database

<sup>‡</sup> As MDA 1996<sup>7</sup>

is an old trial, individual data were available provided to go back in patient records and thus only some information was extracted from investigator for this meta-analysis. This excluded toxicities data. So, information from toxicity data was extracted from the publication doing some hypotheses. We considered (i) patients with a specific toxicity as different to patients with another toxicity and (ii) nausea and vomiting toxicity as toxicities of grade  $\geq 3$  although specified as grade  $\geq 2$  in the paper. A sensitivity analysis for nausea and/or vomiting was performed after excluding this trial

<sup>‡</sup> for hematological toxicities, information was extracted from the publication

<sup>†</sup> only events which were grade  $\geq 3$  were reported. So, missing data were considered as no toxicity or toxicity with grade  $< 3$

<sup>‡‡</sup> febrile neutropenia was extracted from the paper

see eTable 1 for other abbreviations

**eFigure 1.** Flow diagram of studies inclusion and exclusion

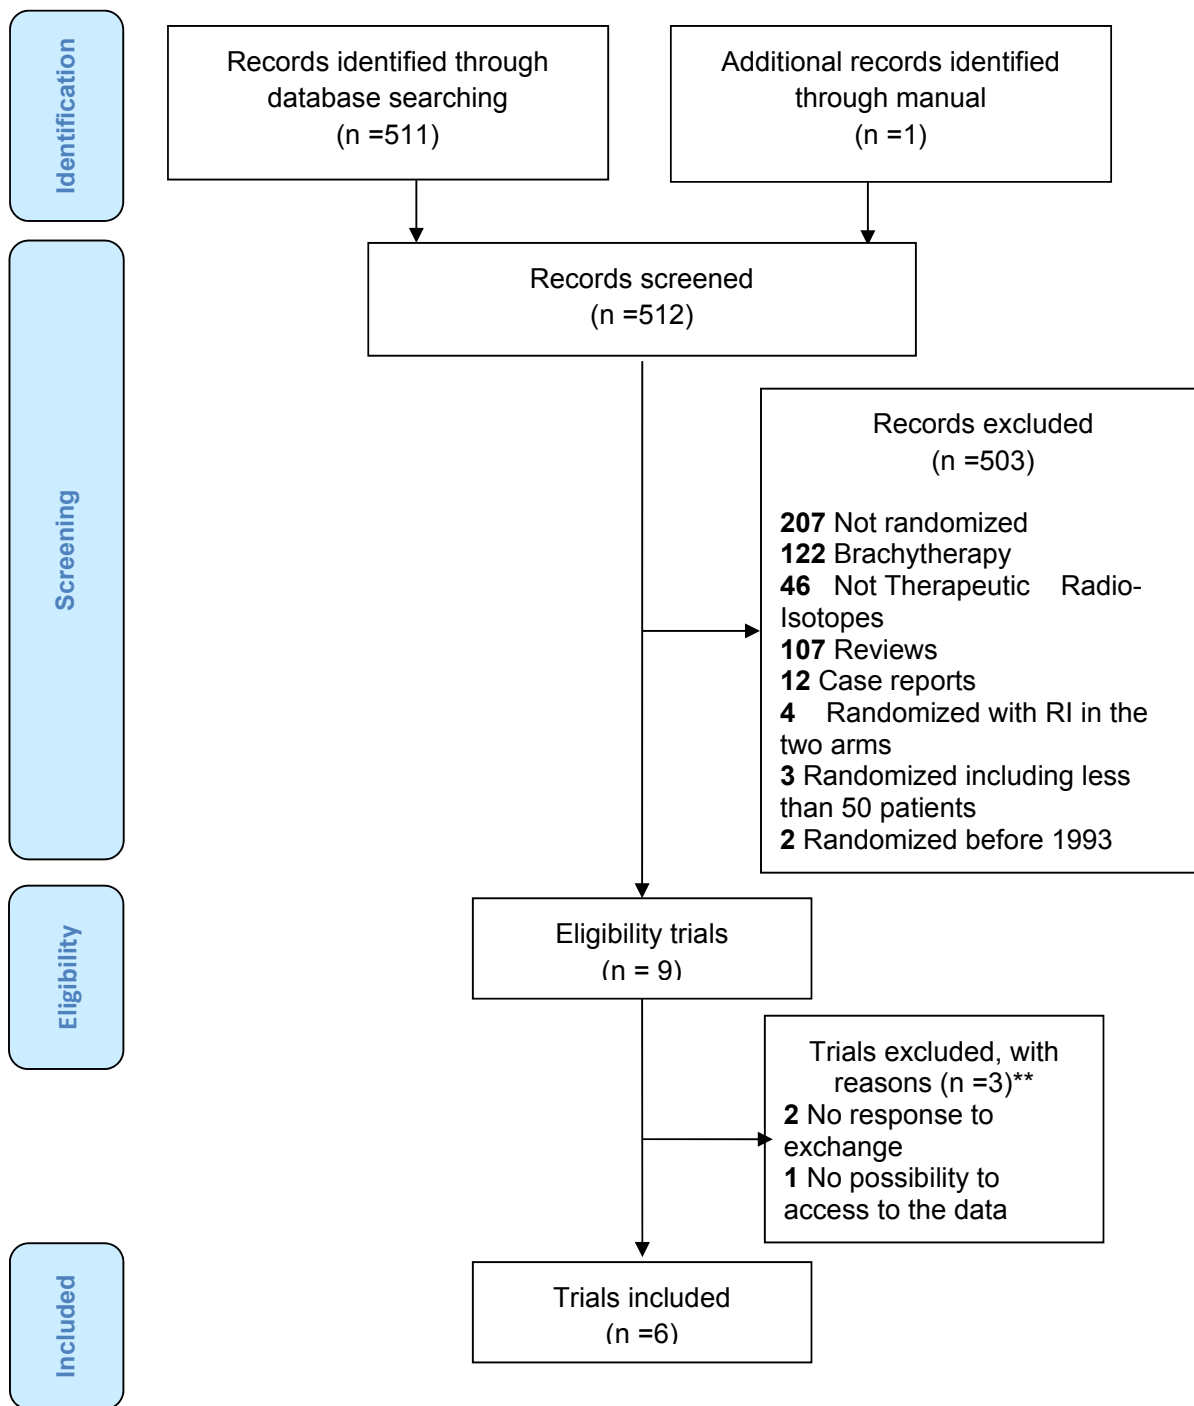

\*Such as preclinical, biomarker, cost and epidemiological studies, \*\*The sample size of these trials ranges from 80 to 152 patients. The only information we could extract from the published data is an estimation of overall survival hazard ratio without precision for 2 trials using the medians and assuming an exponential distribution (See eReferences<sup>12-14</sup>).

**eFigure 2.** Overall survival for trials comparing radioisotopes (RIs) with no RIs according to the type of radiation emitted from RIs after excluding the MDA 1996 and EORTC trials

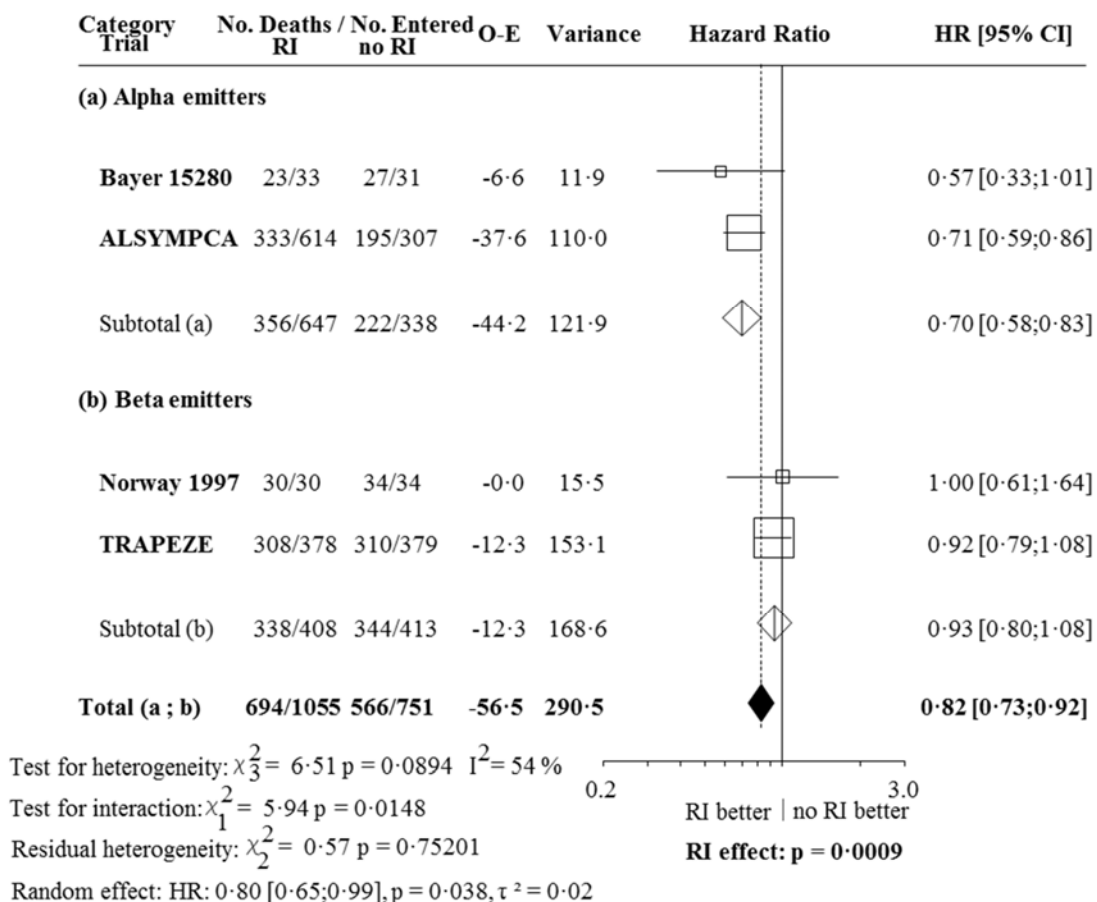

ALSYMPCA= ALPharadin in SYMptomatic Prostate CAncer patients, TRAPEZE= Taxane RAdioisotoPE ZolEdronic acid, RI: radio-isotope, O-E: observed minus expected number of deaths in the experimental arm, HR: Hazard ratio, CI: confidence interval,  $\tau^2$  estimated by DerSimonian and Laird method, Test for heterogeneity:  $p=0.47$ ,  $I^2=0\%$  and  $p=0.75$ ,  $I^2=0\%$  for alpha emitters and beta emitters, respectively

**eFigure 3.** Forest plot for subset analysis of overall survival according to the type of comparison

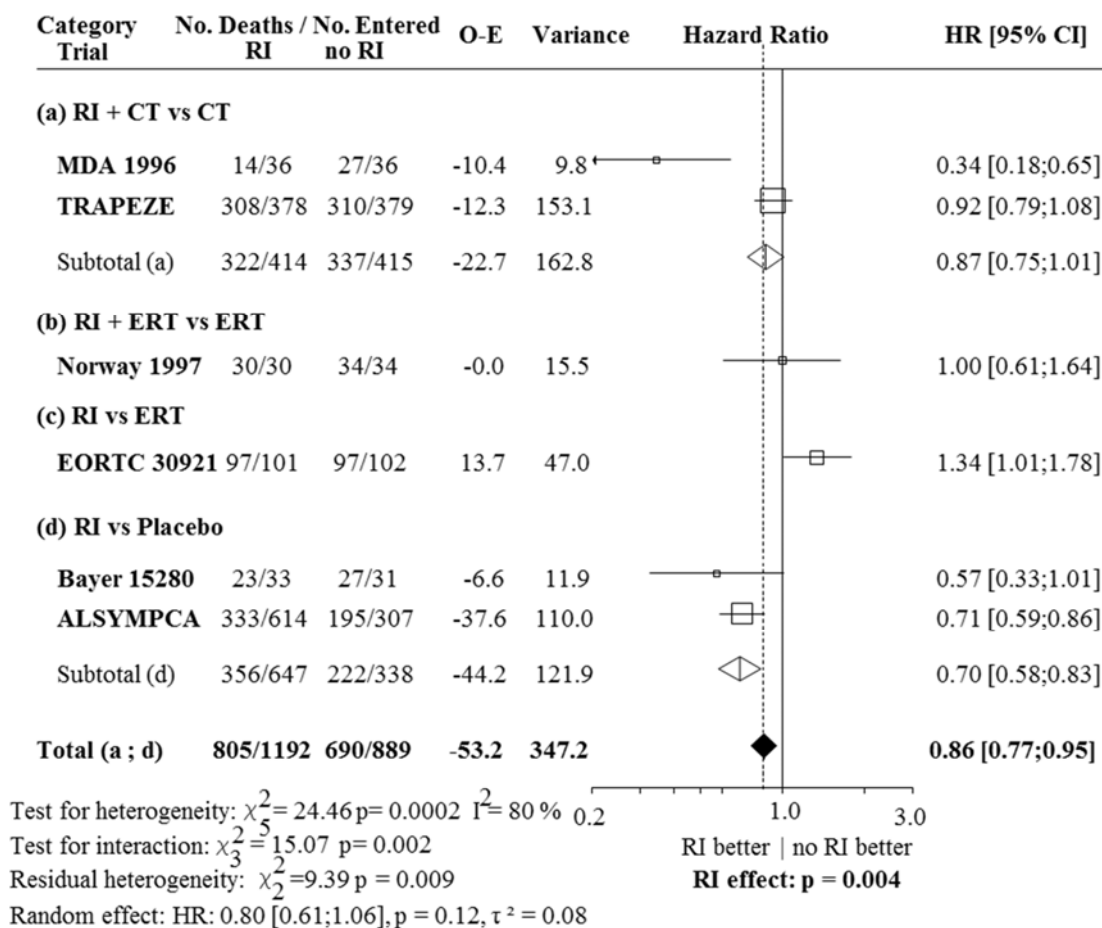

CT: Chemotherapy, ERT: External radiotherapy, RI: radio-isotope  
 ALSYMPCA= ALpharadin in SYMptomatic Prostate CANcer patients, EORTC= European Organisation for Research and Treatment of Cancer, MDA= M D Anderson Cancer Center, TRAPEZE= Taxane RAdioisotoPE ZoEdronic acid, O-E: observed minus expected number of deaths in the experimental arm, HR: Hazard ratio, CI: confidence interval,  $\tau^2$  estimated by DerSimonian and Laird method



**eFigure 4.** Forest plots for serum prostate-specific antigen subgroup analysis for overall survival

**A. PSA subgroup analysis after excluding MDA 1996<sup>7</sup> and EORTC 30921<sup>6</sup>**

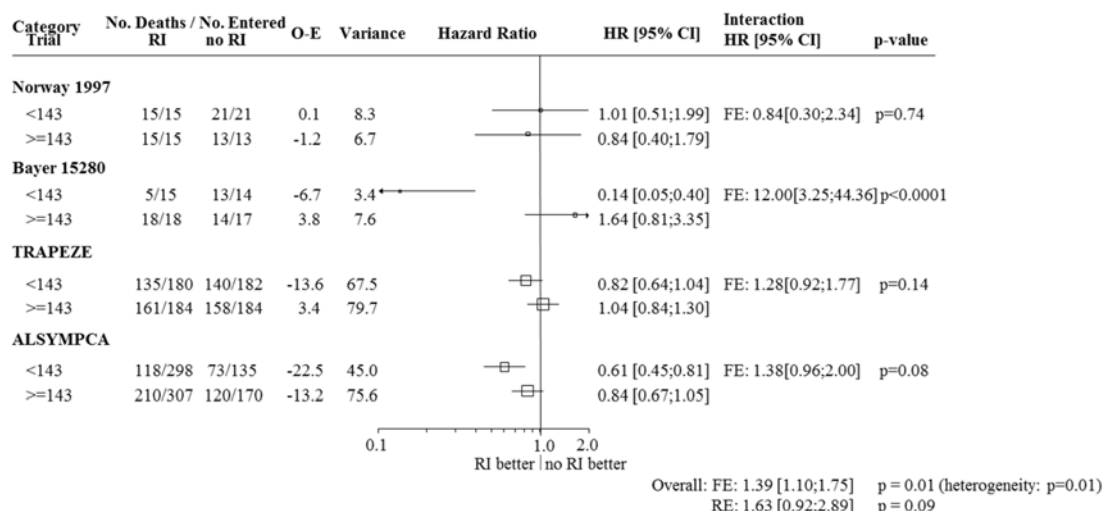

RI: radio-isotope, O-E: observed minus expected number of deaths in the experimental arm, HR: Hazard ratio, CI: confidence interval, FE: fixed effect model, RE: random effect model  
see eFigure 3 for other abbreviations

**B. PSA subgroup analysis after excluding MDA 1996<sup>7</sup>, EORTC 30921<sup>6</sup> and Bayer 15280<sup>10</sup>: Sensitivity analysis**

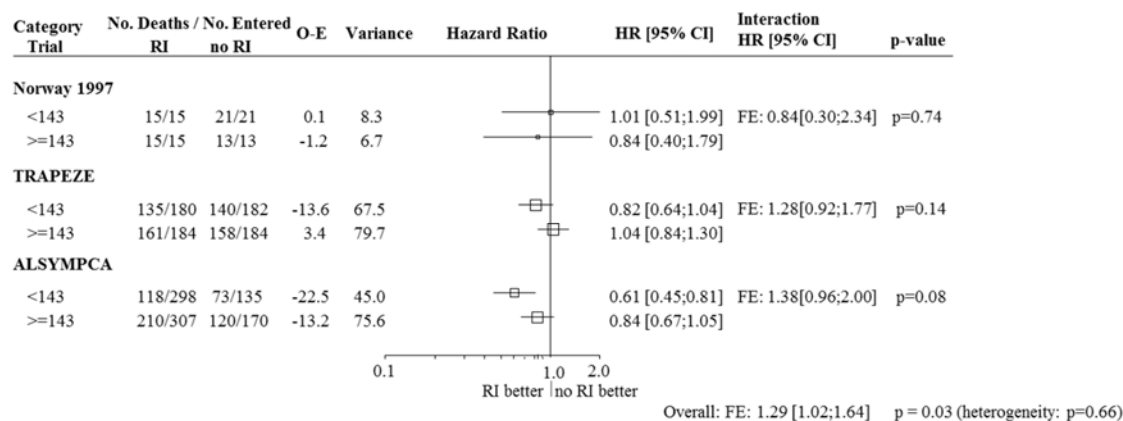

RI: radio-isotope, O-E: observed minus expected number of deaths in the experimental arm, HR: Hazard ratio, CI: confidence interval, FE: fixed effect model  
see eFigure 3 for other abbreviations

**eFigure 5.** Forest plot for subset analysis according to the type of comparison for symptomatic skeletal event (SSE)–free survival<sup>†</sup>

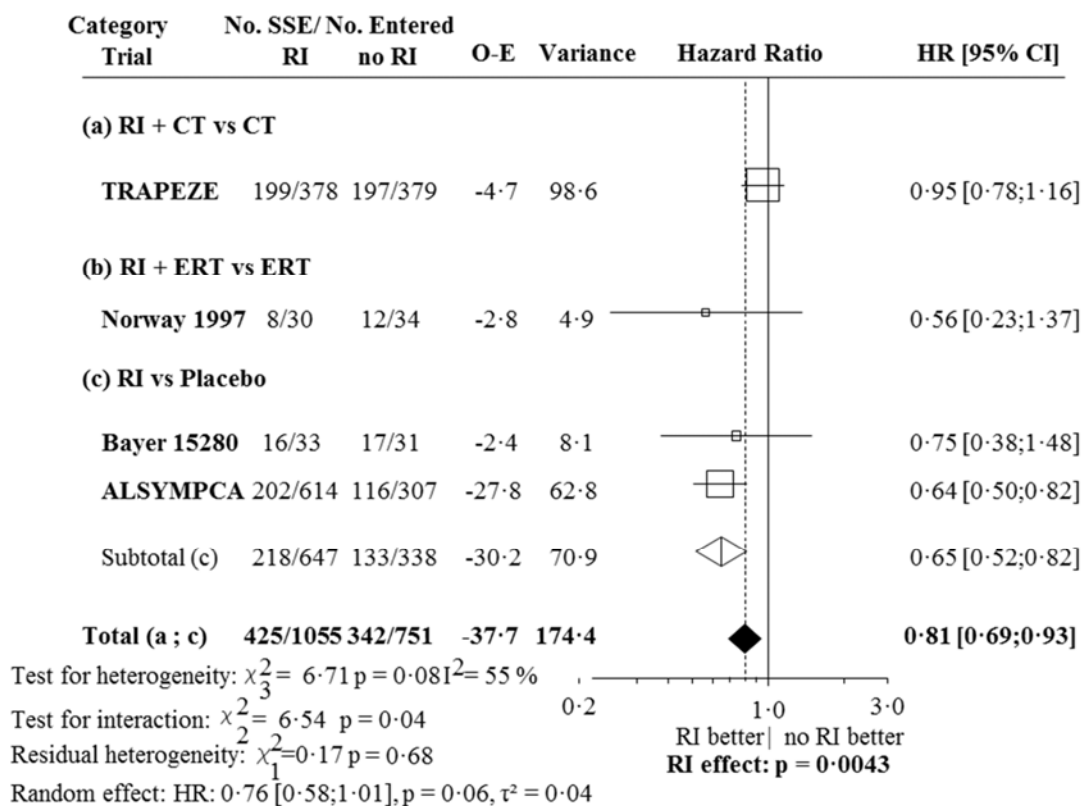

<sup>†</sup> MDA 1996<sup>7</sup> and EORTC 30921's<sup>6</sup> trials were excluded for this analysis since no available information for the former and not reliability data from the latter  
 SEE: symptomatic skeletal event, CT: Chemotherapy, ERT: External radiotherapy, RI: radio-isotope, O-E: observed minus expected number of SSE in the experimental arm, HR: Hazard ratio, CI: confidence interval,  $\tau^2$  estimated by DerSimonian and Laird method  
 see eFigure 3 for other abbreviations

**eFigure 6.** Forest plots of alkaline phosphatase level subgroup analysis for symptomatic skeletal event (SSE)–free survival<sup>†</sup>

**A. Alkaline Phosphatase Level (ALP) after excluding MDA 1996<sup>7</sup> and EORTC 30921<sup>6</sup>**

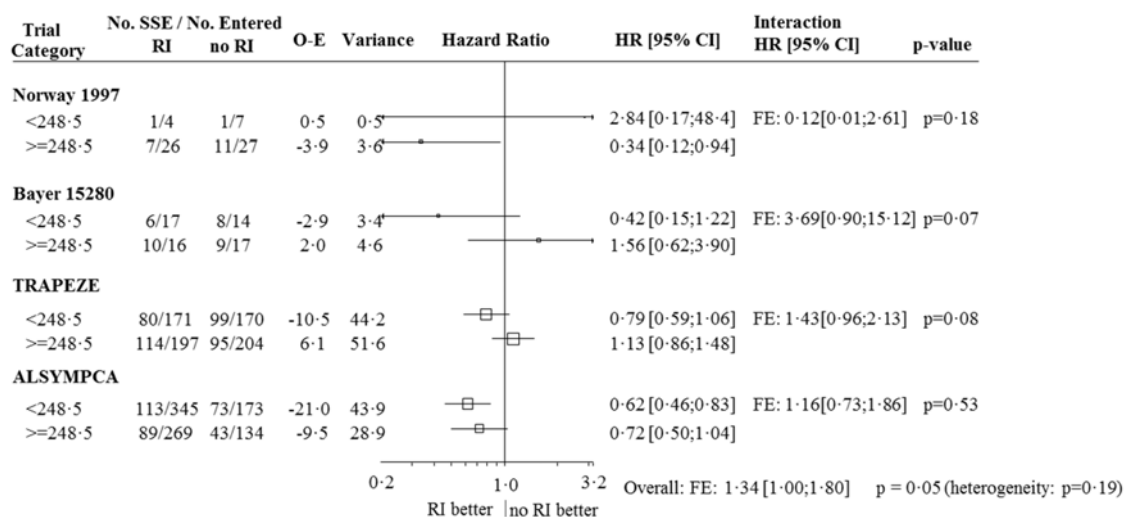

<sup>†</sup> MDA 1996<sup>7</sup> and EORTC 30921<sup>6</sup> trials were excluded for this analysis since no available information (MDA 1996<sup>7</sup>) and not reliability data (EORTC 30921<sup>6</sup>)  
 RI: radio-isotope, O-E: observed minus expected number of SSE in the experimental arm, HR: Hazard ratio, CI: confidence interval, FE: fixed effect model  
 see eFigure 3 for other abbreviations

**B. Alkaline Phosphatase Level (ALP) after excluding MDA 1996<sup>7</sup>, EORTC 30921<sup>6</sup> Norway<sup>8</sup> and Bayer15280<sup>10</sup> : Sensitivity analysis**

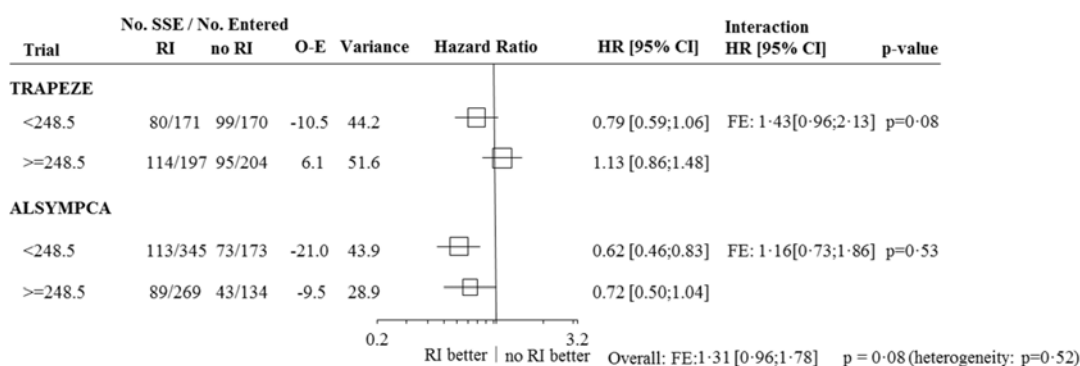

<sup>†</sup> MDA 1996<sup>7</sup> and EORTC 30921<sup>6</sup> trials were excluded for this analysis since no available information (MDA 1996<sup>7</sup>) and not reliability data (EORTC 30921<sup>6</sup>)  
 RI: radio-isotope, O-E: observed minus expected number of SSE in the experimental arm, HR: Hazard ratio, CI: confidence interval, FE: fixed effect model  
 see eFigure 3 for other abbreviations

**eFigure 7.** Hematological toxic effects analysis

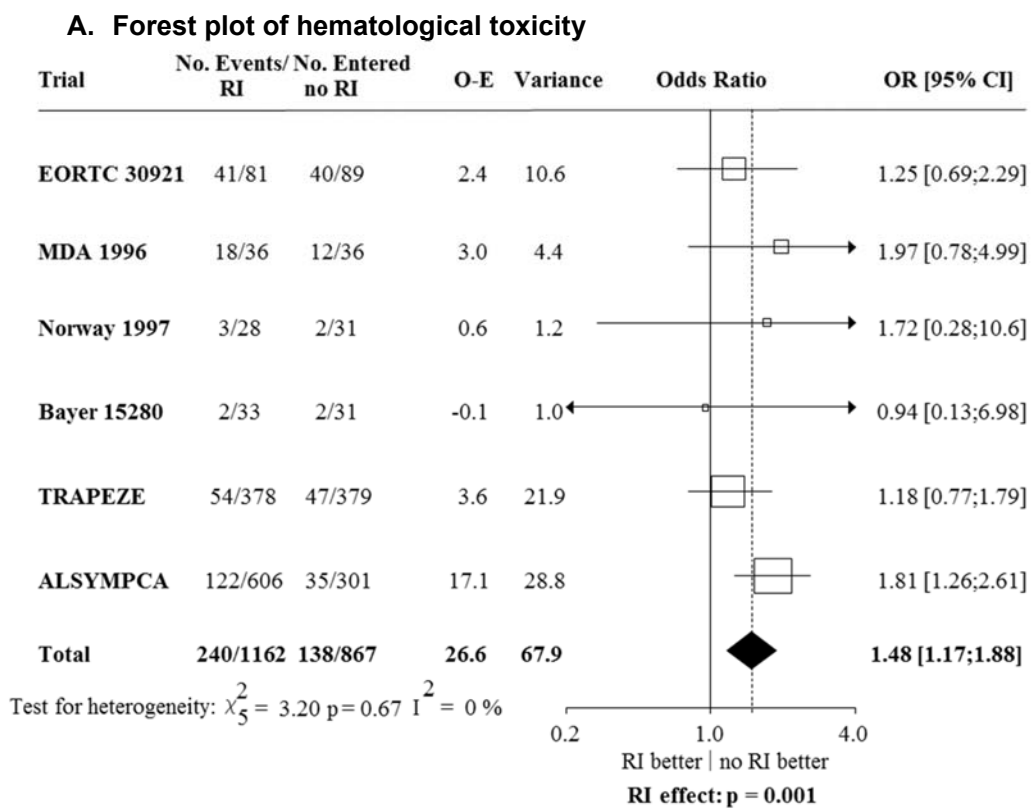

RI: radio-isotope, O-E: observed minus expected number of hematological toxicity events in the experimental arm, OR: Odds ratio, CI: confidence interval  
see eFigure 3 for other abbreviations

**B. Forest plot of hematological toxicity according to the type of radiation emitted from radio-isotopes (RI) (unplanned analysis)**

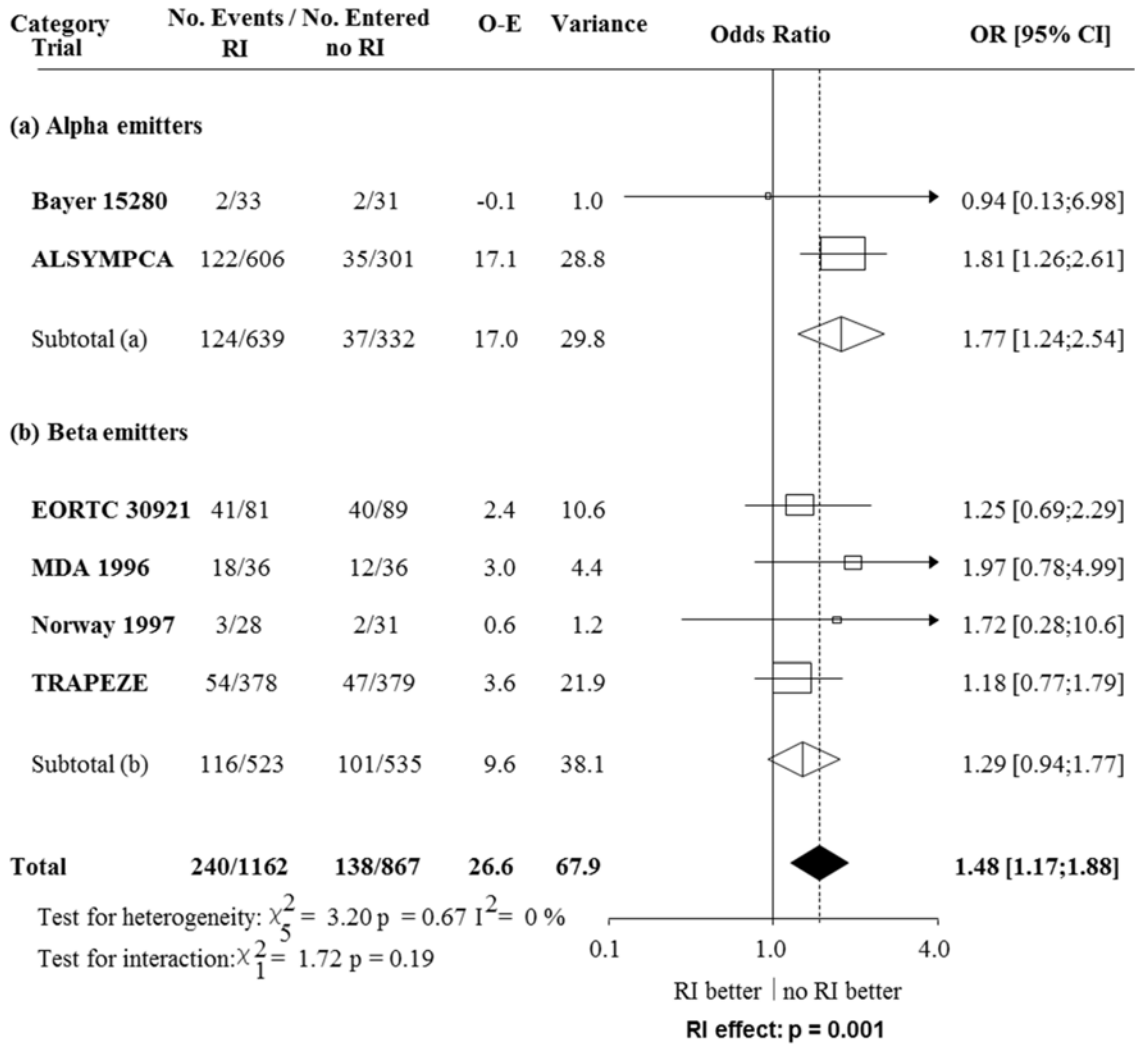

RI: radio-isotope, O-E: observed minus expected number of hematological toxicity events in the experimental arm, OR: Odds ratio, CI: confidence interval  
 see eFigure 3 for other abbreviations

**eFigure 8.** Nausea and/or vomiting analysis

**A. Forest plot of nausea and/or vomiting**

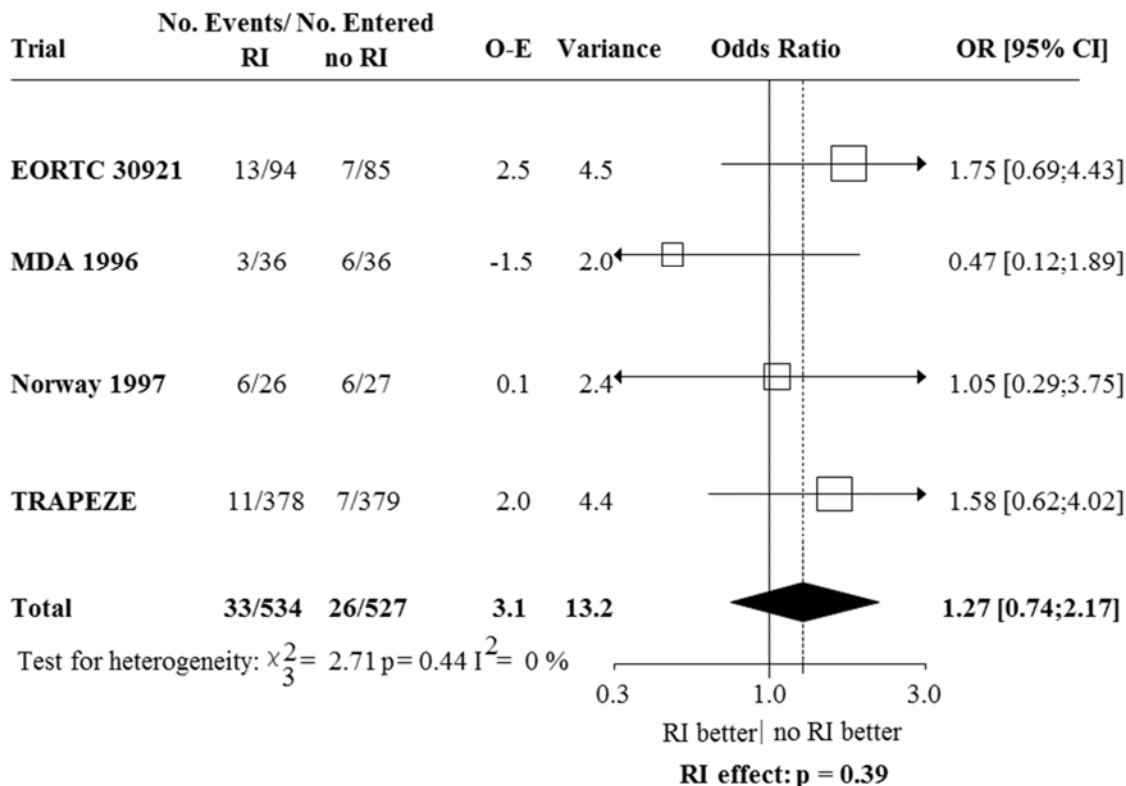

RI: radio-isotope, O-E: observed minus expected number of nausea and/or vomiting events in the experimental arm, OR: Odds ratio, CI: confidence interval  
see eFigure 3 for other abbreviations

**B. Forest plot of nausea and/or vomiting after excluding MDA 1996's trial<sup>7</sup>  
(sensitivity analysis)**

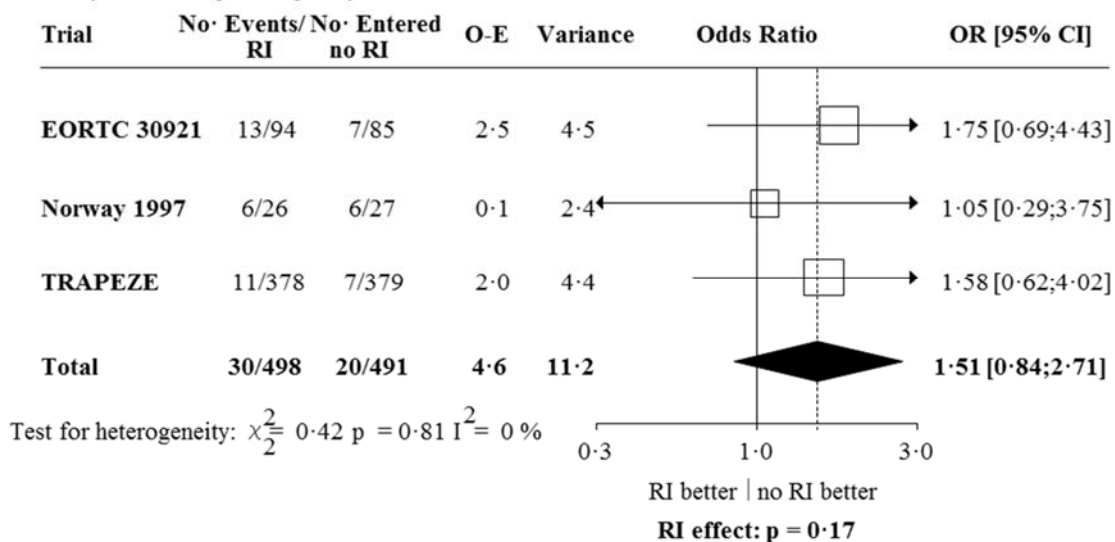

RI: radio-isotope, O-E: observed minus expected number of nausea and/or vomiting events in the experimental arm, OR: Odds ratio, CI: confidence interval  
see eFigure 3 for other abbreviations

**eFigure 9.** Febrile neutropenia toxic effects analysis\*

**A. Forest plot of febrile neutropenia**

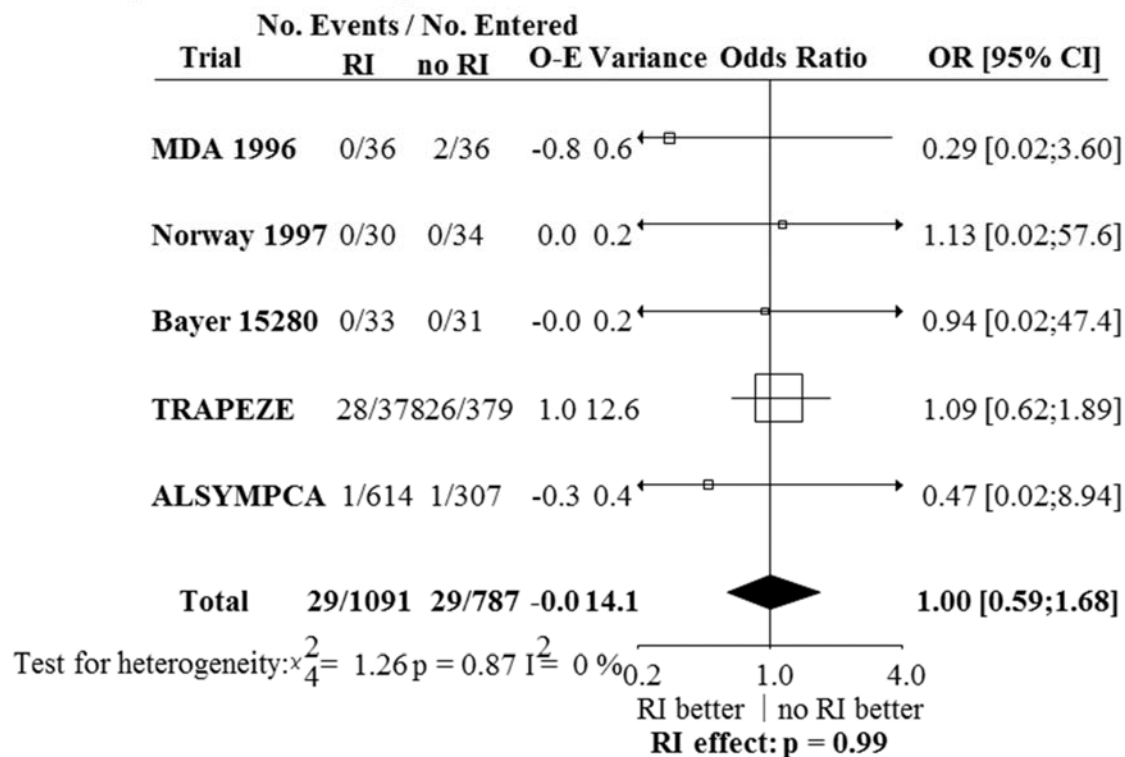

RI: radio-isotope, O-E: observed minus expected number of febrile neutropenia events in the experimental arm, OR: Odds ratio, CI: confidence interval  
 \* we imputed the value of 0.5 for trials with no event for the computation of the odds ratio and its confidence interval, febrile neutropenia is not available for EORTC 309216  
 see eFigure 3 for other abbreviations

**B. Forest plot of febrile neutropenia according to the type of radiation emitted from radio-isotopes (RI)\* (unplanned analysis)**

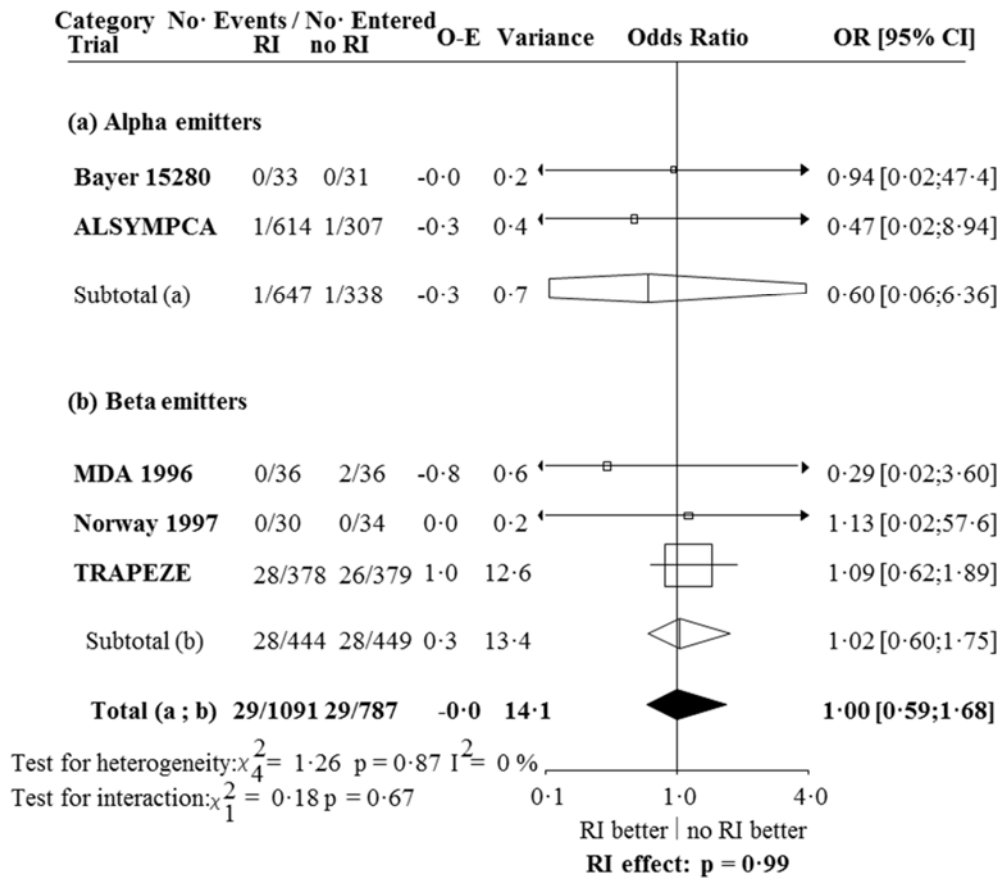

RI: radio-isotope, O-E: observed minus expected number of febrile neutropenia events in the experimental arm, OR: Odds ratio, CI: confidence interval

\* we imputed the value of 0.5 for trials with no event for the computation of the odds ratio and its confidence interval, febrile neutropenia is not available for EORTC 309216 see eFigure 3 for other abbreviations



## eReferences.

1. Cochran WG. The combination of estimates from different experiments. *Biometrics*. 1954;10:101-29.
2. Higgins JPT, Thompson SG. Quantifying heterogeneity in a meta-analysis. *Stat Med*. 2002;21(11):1539-1558.
3. Higgins JPT, Green S, Collaboration C. *Cochrane handbook for systematic reviews of interventions*. Wiley Online Library 2008.
4. DerSimonian R, Laird N. Meta-analysis in clinical trials. *Control Clin Trials*. 1986;7(3):177-188.
5. Fisher DJ, Copas AJ, Tierney JF, Parmar MKB. A critical review of methods for the assessment of patient-level interactions in individual participant data meta-analysis of randomized trials, and guidance for practitioners. *J Clin Epidemiol*. 2011;64(9):949-967.
6. Oosterhof GON, Roberts JT, de Reijke TM, et al. Strontium(89) chloride versus palliative local field radiotherapy in patients with hormonal escaped prostate cancer: a phase III study of the European Organisation for Research and Treatment of Cancer, Genitourinary Group. *Eur Urol*. 2003;44(5):519-526.
7. Tu SM, Millikan RE, Mengistu B, et al. Bone-targeted therapy for advanced androgen-independent carcinoma of the prostate: a randomised phase II trial. *Lancet*. 2001;357(9253):336-341.
8. Smeland S, Erikstein B, Aas M, Skovlund E, Hess SL, Fosså SD. Role of strontium-89 as adjuvant to palliative external beam radiotherapy is questionable: results of a double-blind randomized study. *Int J Radiat Oncol Biol Phys*. 2003;56(5):1397-1404.
9. James ND, Pirrie SJ, Pope AM, et al. Clinical outcomes and survival following treatment of metastatic castrate-refractory prostate cancer with docetaxel alone or with Strontium-89, zoledronic acid, or both: The TRAPEZE randomized clinical trial. *JAMA Oncol*. 2016;2(4):493-499.
10. Nilsson S, Franzén L, Parker C, et al. Bone-targeted radium-223 in symptomatic, hormone-refractory prostate cancer: a randomised, multicentre, placebo-controlled phase II study. *Lancet Oncol*. 2007;8(7):587-594.
11. Parker C, Nilsson S, Heinrich D, et al. Alpha emitter radium-223 and survival in metastatic prostate cancer. *N Engl J Med*. 2013;369(3):213-223.
12. Serafini AN, Houston SJ, Resche I et al. Palliation of Pain Associated With Metastatic Bone Cancer Using Samarium-153 Lexidronam: A Double-Blind Placebo-Controlled Clinical Trial: *J Clin Oncol* 1998; 16: 1574-81.
13. Sartor O, Reid RH, Hoskin PJ et al. Samarium-153-Lexidronam complex for treatment of painful bone metastases in hormone-refractory prostate cancer. *Urology*. 2004; 63 :940-5.
14. Han SH, de Klerk JM, Tan S and al. The PLACORHEN study: a double-blind, placebo-controlled, randomized Radiopharmaceutical study with (186) Re-etidronate in hormone-resistant prostate cancer patients with painful bone metastases. Placebo Controlled Rhenium Study; *J Nucl Med*. 2002; 43:1150-6.
